# Supplementary material for: Real-Time PCR-Based Screening for Homozygous SMN2 Deletion Using Residual Dried Blood Spots
Source: MDPI journal article supplement (doi:10.3390/genes14122159), 2023-11-29
Supplement: s1 [file s1]

**Table S1 Experimental conditions for PCR-RFLP****Table S1-1. Conventional PCR****Table S1-1-1. Conventional PCR reaction mixture**

| Components                           | Volume (μL) |
|--------------------------------------|-------------|
| Distilled water                      | 10.5        |
| 2×PCR Buffer for KOD FX Neo          | 25.0        |
| KOD FX Neo (1 U/μl)                  | 1.0         |
| dNTPs mixture (A, C, G, T each 2 mM) | 10.0        |
| R111 (8 pmol/mL)                     | 1.5         |
| X7-Dra (8 pmol/mL)                   | 1.5         |
| DBS circle (1.2 mm in diameter)      | 1 piece     |
| Total                                | 50.0        |

**Table S1-2. Restriction enzyme digestion****Table S1-2-1. Restriction enzyme mixture**

| Components      | Volume (μL) |
|-----------------|-------------|
| Distilled water | 6.0         |
| 10×M Buffer     | 3.0         |
| Dra I (15 U/μl) | 3.0         |
| PCR products    | 18.0        |
| Total           | 30.0        |

**Table S1-1-2. Conventional PCR conditions**

|   | Step                         | Temperature | Time  |
|---|------------------------------|-------------|-------|
| 1 | Initial denaturation         | 94°C        | 7 min |
| 2 | Denaturation                 | 94°C        | 1 min |
| 3 | Annealing                    | 56°C        | 1 min |
| 4 | Elongation                   | 72°C        | 1 min |
|   | (30 cycles of steps 2 to 4 ) |             |       |
| 5 | Final elongation             | 72°C        | 7 min |
| 6 | Hold or storage              | 15°C        | ∞     |

**Table S1-2-2. Restriction enzyme treatment conditions**

|   | Step                         | Temperature | Time   |
|---|------------------------------|-------------|--------|
| 1 | Restriction enzyme treatment | 37°C        | 12 hrs |
| 2 | Hold or storage              | 15°C        | ∞      |

**Table S2 Experimental conditions for real-time PCR****Table S2-1. Real-time PCR reaction mixture**

| Components                           | Volume (μL) |
|--------------------------------------|-------------|
| Distilled water                      | 3.0         |
| 2×PCR Buffer for KOD FX Neo          | 12.5        |
| KOD FX Neo (1 U/μl)                  | 0.5         |
| dNTPs mixture (A, C, G, T each 2 mM) | 5.0         |
| cenSMNex7forw (10 pM)                | 0.25        |
| cenSMNint7rev (10 pM)                | 0.25        |
| 20x EvaGreen®                        | 2.5         |
| ROX reference dye                    | 0.5         |
| DBS circle (1.2 mm in diameter)      | 1 piece     |
| Total                                | 25.0        |

**Table S2-2. Real-time PCR conditions**

|   | Step                             | Temperature      | Time  |
|---|----------------------------------|------------------|-------|
| 1 | Initial denaturation             | 94°C             | 7 min |
| 2 | Denaturation                     | 94°C             | 1 min |
| 3 | Annealing                        | 56, 58, 60, 62°C | 1 min |
| 4 | Elongation                       | 72°C             | 1 min |
|   | (45, 55 cycles of steps 2 to 4 ) |                  |       |
| 5 | Final elongation                 | 72°C             | 7 min |
| 6 | Storage                          | 20°C             | ∞     |

**Table S3. Characteristics of the healthy control**

|                                 |             |
|---------------------------------|-------------|
| <b>RBC (x10<sup>6</sup>/μL)</b> | <b>4.55</b> |
| <b>Hemoglobin (g/dL)</b>        | <b>14.3</b> |
| <b>Hematocrit (%)</b>           | <b>42.0</b> |
| <b>WBC (/μL)</b>                | <b>4700</b> |

**Table S4. Characteristics of artificial blood samples**

**Table S4-1. Different hematocrits**

|                                           | Ht 40% | Ht 60% | Ht 80% |
|-------------------------------------------|--------|--------|--------|
| RBC ( $\times 10^6/\mu\text{L}$ )         | 4.55   | 7.30   | 9.63   |
| Hemoglobin (g/dL)                         | 14.3   | 22.7   | 29.0   |
| Hematocrit (%)                            | 42.0   | 66.3   | 84.7   |
| WBC ( $/\mu\text{L}$ )                    | 4700   | 4800   | 3200   |
| Estimated DNA amount in a DBS circle (ng) | ~70    | ~70    | ~50    |

**Table S4-2. Different WBC counts**

|                                           | Normal WBC count | Low WBC count | Very low WBC count |
|-------------------------------------------|------------------|---------------|--------------------|
| RBC ( $\times 10^6/\mu\text{L}$ )         | 5.93             | 6.33          | 6.21               |
| Hemoglobin (g/dL)                         | 18.5             | 20.0          | 19.3               |
| Hematocrit (%)                            | 53.2             | 56.7          | 55.1               |
| WBC ( $/\mu\text{L}$ )                    | 4100             | 700           | 300                |
| Estimated DNA amount in a DBS circle (ng) | ~60              | ~10           | ~5                 |

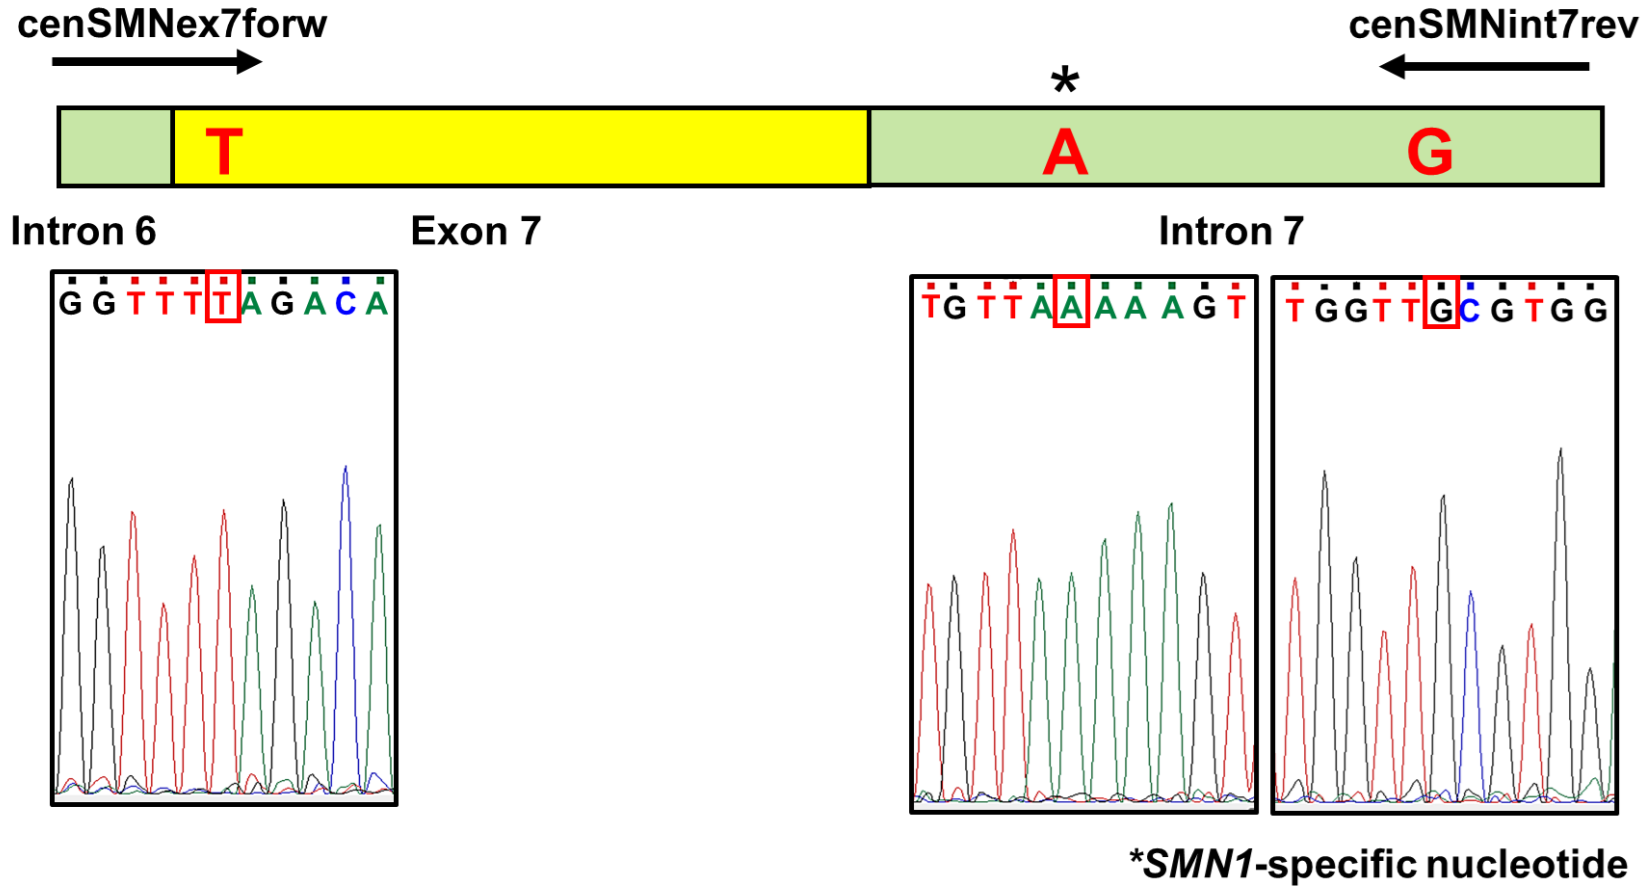

**Figure S1.** Sequencing analysis of amplified PCR products from DBS with *SMN2* deletion. PCR product from DBS with *SMN2* deletion showed the presence of an *SMN1*-specific nucleotide.

(1) Real-time PCR: Nucleotide sequences of *SMN1* and *SMN2*

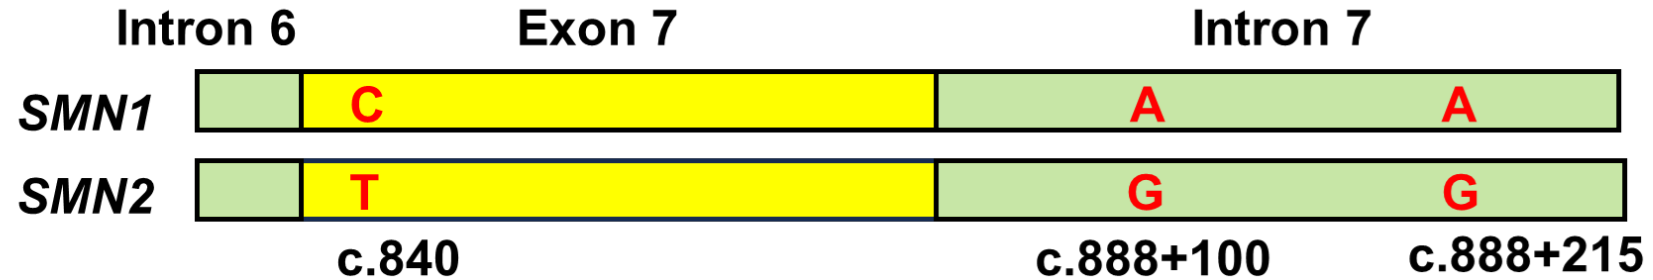

(2) Real-time PCR: Amplified PCR products from DBS with *SMN2* deletion

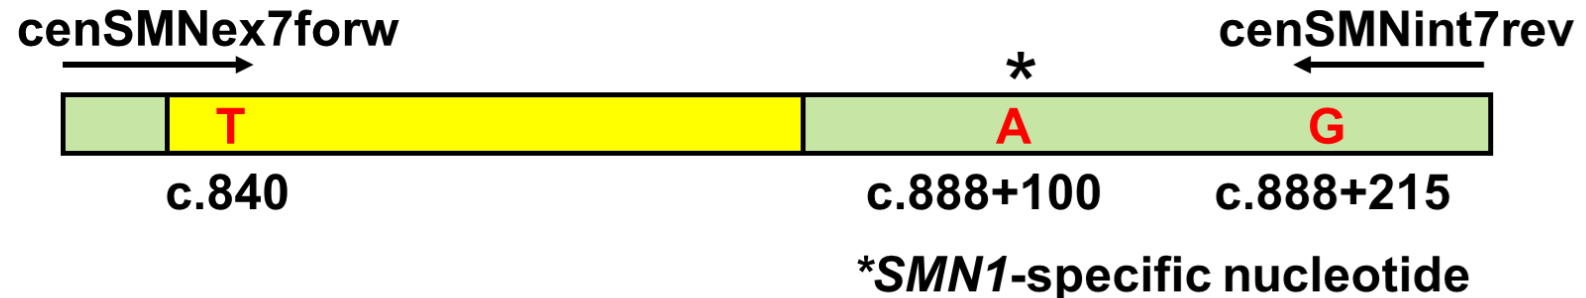

**Figure S2.** An *SMN1*-specific nucleotide identified in false-negative PCR products. *SMN2*-specific primers can amplify *SMN1* sequences by mis-annealing of the primers to *SMN1* sequence under some conditions including low annealing temperature.
